# Supplementary material
Source: MDPI journal article supplement (https://www.mdpi.com/2076-3417/12/24/12601)
Supplement: s1 [file s1]

# Trends of Changes in Minimum Lake Water Temperature in Poland

Mariusz Ptak <sup>1,\*</sup>, Temidayo Olowoyeye <sup>2</sup> and Mariusz Sojka <sup>2</sup>

<sup>1</sup> Department of Hydrology and Water Management, Adam Mickiewicz University, Krygowskiego 10, 61-680 Poznań, Poland

<sup>2</sup> Department of Land Improvement, Environmental Development and Spatial Management, Poznań University of Life Sciences, Piątkowska 94E, 60-649 Poznań, Poland

\* Correspondence: marp114@wp.pl

**Table S1.** Changes in lake minimum water temperatures in the period 1972-2021.

| Śląskie |     |         |         | Śępoleńskie                  |     |         |         |                              |
|---------|-----|---------|---------|------------------------------|-----|---------|---------|------------------------------|
| Period  | S   | Z-value | P-value | Sen's Slope (°C per decade ) | S   | Z-value | P-value | Sen's Slope (°C per decade ) |
| Nov     | 330 | 2.84    | 0.005** | 0.45                         | 438 | 3.77    | 0.000** | 0.51                         |
| Dec     | 532 | 4.58    | 0.000** | 0.51                         | 398 | 3.42    | 0.001** | 0.31                         |
| Jan     | 138 | 1.18    | 0.238   | 0.07                         | 160 | 1.37    | 0.171   | 0.07                         |
| Feb     | 354 | 3.04    | 0.002** | 0.23                         | 124 | 1.06    | 0.289   | 0.09                         |
| Mar     | 302 | 2.59    | 0.009** | 0.28                         | 246 | 2.11    | 0.035*  | 0.22                         |
| Apr     | 296 | 2.54    | 0.011*  | 0.37                         | 196 | 1.68    | 0.093   | 0.26                         |
| May     | 484 | 4.16    | 0.000** | 0.75                         | 372 | 3.20    | 0.001** | 0.69                         |
| Jun     | 344 | 2.96    | 0.003** | 0.51                         | 300 | 2.58    | 0.010** | 0.49                         |
| Jul     | 536 | 4.61    | 0.000** | 0.72                         | 352 | 3.03    | 0.002** | 0.53                         |
| Aug     | 634 | 5.46    | 0.000** | 0.75                         | 400 | 3.44    | 0.001** | 0.52                         |
| Sep     | 414 | 3.56    | 0.000** | 0.62                         | 364 | 3.13    | 0.002** | 0.44                         |
| Oct     | 378 | 3.25    | 0.001** | 0.59                         | 332 | 2.85    | 0.004** | 0.42                         |
| Year    | 320 | 2.75    | 0.006** | 0.13                         | 220 | 1.89    | 0.059   | 0.08                         |
| T90%    | 458 | 3.94    | 0.000** | 0.32                         | 236 | 2.03    | 0.043*  | 0.15                         |

| Charzykowskie |     |         |         | Gardno                      |     |         |         |                              |
|---------------|-----|---------|---------|-----------------------------|-----|---------|---------|------------------------------|
| Period        | S   | Z-value | P-value | Sen's Slope (°C per decade) | S   | Z-value | P-value | Sen's Slope (°C per decade ) |
| Nov           | 376 | 3.23    | 0.001** | 0.55                        | 330 | 2.84    | 0.005** | 0.38                         |
| Dec           | 374 | 3.22    | 0.001** | 0.40                        | 390 | 3.35    | 0.001** | 0.14                         |
| Jan           | 298 | 2.56    | 0.010*  | 0.14                        | -33 | -0.28   | 0.781   | 0.00                         |
| Feb           | 404 | 3.47    | 0.001** | 0.19                        | -68 | -0.58   | 0.562   | 0.00                         |
| Mar           | 494 | 4.25    | 0.000** | 0.36                        | 288 | 2.47    | 0.013*  | 0.17                         |
| Apr           | 434 | 3.73    | 0.000** | 0.58                        | 420 | 3.61    | 0.000** | 0.70                         |
| May           | 542 | 4.66    | 0.000** | 0.83                        | 372 | 3.20    | 0.001** | 0.83                         |
| Jun           | 370 | 3.18    | 0.001** | 0.62                        | 484 | 4.16    | 0.000** | 0.80                         |
| Jul           | 318 | 2.73    | 0.006** | 0.58                        | 354 | 3.04    | 0.002** | 0.56                         |
| Aug           | 432 | 3.72    | 0.000** | 0.53                        | 440 | 3.78    | 0.000** | 0.58                         |
| Sep           | 332 | 2.85    | 0.004** | 0.30                        | 230 | 1.97    | 0.048*  | 0.36                         |
| Oct           | 256 | 2.20    | 0.028*  | 0.30                        | 448 | 3.85    | 0.000** | 0.68                         |
| Year          | 390 | 3.35    | 0.001** | 0.13                        | 1   | 0.00    | 1.000   | 0.00                         |

|      |     |      |         |      |     |      |       |      |
|------|-----|------|---------|------|-----|------|-------|------|
| T90% | 476 | 4.09 | 0.000** | 0.37 | 154 | 1.32 | 0.187 | 0.05 |
|------|-----|------|---------|------|-----|------|-------|------|

| Bachotek |     |         |         | Jeziorak                        |     |         |         |                                 |
|----------|-----|---------|---------|---------------------------------|-----|---------|---------|---------------------------------|
| Period   | S   | Z-value | P-value | Sen's Slope<br>(°C per decade ) | S   | Z-value | P-value | Sen's Slope<br>(°C per decade ) |
| Nov      | 567 | 4.88    | 0.000** | 0.80                            | 338 | 2.90    | 0.004** | 0.45                            |
| Dec      | 521 | 4.48    | 0.000** | 0.44                            | 214 | 1.84    | 0.066   | 0.14                            |
| Jan      | 222 | 1.90    | 0.057   | 0.10                            | 7   | 0.05    | 0.959   | 0.00                            |
| Feb      | 316 | 2.72    | 0.007** | 0.14                            | 108 | 0.92    | 0.356   | 0.06                            |
| Mar      | 370 | 3.18    | 0.001** | 0.31                            | 128 | 1.09    | 0.274   | 0.08                            |
| Apr      | 406 | 3.49    | 0.000** | 0.53                            | 212 | 1.82    | 0.069   | 0.36                            |
| May      | 468 | 4.03    | 0.000** | 0.95                            | 418 | 3.59    | 0.000** | 0.75                            |
| Jun      | 404 | 3.47    | 0.001** | 0.73                            | 342 | 2.94    | 0.003** | 0.57                            |
| Jul      | 468 | 4.03    | 0.000** | 0.66                            | 468 | 4.03    | 0.000** | 0.67                            |
| Aug      | 518 | 4.46    | 0.000** | 0.71                            | 502 | 4.32    | 0.000** | 0.76                            |
| Sep      | 440 | 3.78    | 0.000** | 0.55                            | 402 | 3.46    | 0.001** | 0.63                            |
| Oct      | 424 | 3.65    | 0.000** | 0.56                            | 274 | 2.35    | 0.019*  | 0.43                            |
| Year     | 366 | 3.15    | 0.002** | 0.10                            | 50  | 0.42    | 0.672   | 0.01                            |
| T90%     | 404 | 3.47    | 0.001** | 0.29                            | 118 | 1.01    | 0.313   | 0.08                            |

| Mikołajskie |     |         |         | Selmęt Wielki                  |     |         |         |                                 |
|-------------|-----|---------|---------|--------------------------------|-----|---------|---------|---------------------------------|
| Period      | S   | Z-value | P-value | Sen's Slope<br>(°C per decade) | S   | Z-value | P-value | Sen's Slope<br>(°C per decade ) |
| Nov         | 376 | 3.16    | 0.002** | 0.45                           | 410 | 3.53    | 0.000** | 0.54                            |
| Dec         | 374 | 3.04    | 0.002** | 0.33                           | 544 | 4.68    | 0.000** | 0.40                            |
| Jan         | 298 | 0.84    | 0.398   | 0.03                           | 378 | 3.25    | 0.001** | 0.13                            |
| Feb         | 404 | 2.08    | 0.038*  | 0.06                           | 404 | 3.47    | 0.001** | 0.16                            |
| Mar         | 494 | 2.21    | 0.027*  | 0.15                           | 416 | 3.58    | 0.000** | 0.26                            |
| Apr         | 434 | 2.40    | 0.016*  | 0.36                           | 408 | 3.51    | 0.000** | 0.59                            |
| May         | 542 | 3.23    | 0.001** | 0.60                           | 458 | 3.94    | 0.000** | 0.92                            |
| Jun         | 370 | 2.90    | 0.004** | 0.62                           | 456 | 3.92    | 0.000** | 0.78                            |
| Jul         | 318 | 3.35    | 0.001** | 0.49                           | 462 | 3.97    | 0.000** | 0.65                            |
| Aug         | 432 | 4.04    | 0.000** | 0.54                           | 480 | 4.13    | 0.000** | 0.55                            |

|      |     |      |         |      |     |      |         |      |
|------|-----|------|---------|------|-----|------|---------|------|
| Sep  | 332 | 2.94 | 0.003** | 0.42 | 190 | 1.63 | 0.103   | 0.28 |
| Oct  | 256 | 2.19 | 0.029*  | 0.29 | 290 | 2.49 | 0.013*  | 0.41 |
| Year | 390 | 1.34 | 0.182   | 0.02 | 589 | 5.07 | 0.000** | 0.15 |
| T90% | 476 | 3.08 | 0.002** | 0.16 | 356 | 3.06 | 0.002** | 0.17 |

| Studzieniczne |     |         |         | Hancza                         |     |         |         |                                 |
|---------------|-----|---------|---------|--------------------------------|-----|---------|---------|---------------------------------|
| Period        | S   | Z-value | P-value | Sen's Slope<br>(°C per decade) | S   | Z-value | P-value | Sen's Slope<br>(°C per decade ) |
| Nov           | 330 | 2.84    | 0.005** | 0.46                           | 104 | 0.89    | 0.375   | 0.11                            |
| Dec           | 232 | 1.99    | 0.046*  | 0.17                           | 296 | 2.54    | 0.011*  | 0.19                            |
| Jan           | 66  | 0.56    | 0.575   | 0.02                           | 236 | 2.05    | 0.040*  | 0.04                            |
| Feb           | 288 | 2.47    | 0.013*  | 0.11                           | 430 | 3.70    | 0.000** | 0.09                            |
| Mar           | 366 | 3.15    | 0.002** | 0.22                           | 362 | 3.11    | 0.002** | 0.16                            |
| Apr           | 334 | 2.87    | 0.004** | 0.40                           | 370 | 3.18    | 0.001** | 0.32                            |
| May           | 288 | 2.47    | 0.013*  | 0.59                           | 490 | 4.22    | 0.000** | 0.77                            |
| Jun           | 296 | 2.54    | 0.011*  | 0.47                           | 320 | 2.75    | 0.006** | 0.74                            |
| Jul           | 314 | 2.70    | 0.007*  | 0.47                           | 252 | 2.16    | 0.030*  | 0.49                            |
| Aug           | 426 | 3.66    | 0.000** | 0.57                           | 290 | 2.49    | 0.013*  | 0.38                            |
| Sep           | 308 | 2.65    | 0.008** | 0.47                           | 26  | 0.22    | 0.829   | 0.05                            |
| Oct           | 322 | 2.77    | 0.006** | 0.41                           | 146 | 1.25    | 0.211   | 0.24                            |
| Year          | 196 | 1.68    | 0.093   | 0.05                           | 242 | 2.18    | 0.029*  | 0.01                            |
| T90%          | 396 | 3.40    | 0.001** | 0.16                           | 424 | 3.65    | 0.000** | 0.20                            |

\*- significant at a level of 0.05, \*\*- significant at a level of 0.01

**Table S2** Changes in air temperatures in selected meteorological stations in the period 1972-2021

| Zielona Góra |     |         |         | Łeba                            |     |         |                                 |
|--------------|-----|---------|---------|---------------------------------|-----|---------|---------------------------------|
| Period       | S   | Z-value | P-value | Sen's Slope<br>(°C per decade ) | S   | Z-value | Sen's Slope<br>(°C per decade ) |
| Nov          | 112 | 0.96    | 0.339   | 0.25                            | 112 | 0.96    | 0.339                           |
| Dec          | 220 | 1.89    | 0.059   | 0.83                            | 220 | 1.89    | 0.059                           |
| Jan          | -8  | -0.06   | 0.952   | -0.04                           | -8  | -0.06   | 0.952                           |
| Feb          | 56  | 0.47    | 0.635   | 0.28                            | 56  | 0.47    | 0.635                           |
| Mar          | 116 | 0.99    | 0.322   | 0.30                            | 116 | 0.99    | 0.322                           |
| Apr          | 204 | 1.75    | 0.080   | 0.36                            | 204 | 1.75    | 0.080                           |
| May          | 138 | 1.18    | 0.238   | 0.37                            | 138 | 1.18    | 0.238                           |
| Jun          | 462 | 3.97    | 0.000** | 0.71                            | 462 | 3.97    | 0.000**                         |
| Jul          | 364 | 3.13    | 0.002** | 0.48                            | 364 | 3.13    | 0.002**                         |
| Aug          | 344 | 2.96    | 0.003** | 0.56                            | 344 | 2.96    | 0.003**                         |
| Sep          | 194 | 1.66    | 0.096   | 0.27                            | 194 | 1.66    | 0.096                           |
| Oct          | 198 | 1.70    | 0.089   | 0.37                            | 198 | 1.70    | 0.089                           |
| Year         | -6  | -0.04   | 0.966   | -0.01                           | -6  | -0.04   | 0.966                           |
| T90%         | 186 | 1.59    | 0.111   | 0.30                            | 186 | 1.59    | 0.111                           |

| Chojnice |     |         |         | Kętrzyn                         |     |         |                                 |
|----------|-----|---------|---------|---------------------------------|-----|---------|---------------------------------|
| Period   | S   | Z-value | P-value | Sen's Slope<br>(°C per decade ) | S   | Z-value | Sen's Slope<br>(°C per decade ) |
| Nov      | 200 | 1.72    | 0.086   | 0.50                            | 166 | 1.42    | 0.155                           |
| Dec      | 282 | 2.42    | 0.015*  | 1.04                            | 278 | 2.39    | 0.017*                          |
| Jan      | -46 | -0.39   | 0.698   | -0.17                           | -64 | -0.54   | 0.587                           |
| Feb      | -2  | -0.01   | 0.993   | -0.01                           | 4   | 0.03    | 0.979                           |
| Mar      | 126 | 1.08    | 0.281   | 0.39                            | 106 | 0.91    | 0.365                           |
| Apr      | 216 | 1.85    | 0.064   | 0.35                            | 246 | 2.11    | 0.035*                          |
| May      | 204 | 1.75    | 0.080   | 0.44                            | 206 | 1.77    | 0.077                           |
| Jun      | 528 | 4.54    | 0.000** | 0.78                            | 374 | 3.22    | 0.001**                         |
| Jul      | 453 | 3.90    | 0.000** | 0.59                            | 418 | 3.59    | 0.000**                         |
| Aug      | 308 | 2.65    | 0.008** | 0.39                            | 438 | 3.77    | 0.000**                         |
| Sep      | 272 | 2.34    | 0.019*  | 0.39                            | 218 | 1.87    | 0.061                           |
| Oct      | 130 | 1.11    | 0.266   | 0.26                            | 78  | 0.66    | 0.507                           |
| Year     | -12 | -0.09   | 0.924   | -0.10                           | -36 | -0.30   | 0.763                           |
| T90%     | 204 | 1.75    | 0.080   | 0.32                            | 168 | 1.44    | 0.150                           |

| Olsztyn |     |         |         | Toruń                           |     |         |                                 |
|---------|-----|---------|---------|---------------------------------|-----|---------|---------------------------------|
| Period  | S   | Z-value | P-value | Sen's Slope<br>(°C per decade ) | S   | Z-value | Sen's Slope<br>(°C per decade ) |
| Nov     | 188 | 1.61    | 0.107   | 0.50                            | 156 | 1.34    | 0.182                           |
| Dec     | 258 | 2.22    | 0.027*  | 1.11                            | 290 | 2.49    | 0.013*                          |
| Jan     | -58 | -0.49   | 0.623   | -0.31                           | 0   | 0.00    | 1.000                           |
| Feb     | -16 | -0.13   | 0.897   | -0.15                           | 2   | 0.01    | 0.993                           |
| Mar     | 88  | 0.75    | 0.453   | 0.28                            | 76  | 0.65    | 0.518                           |
| Apr     | 282 | 2.42    | 0.015*  | 0.38                            | 218 | 1.87    | 0.061                           |
| May     | 200 | 1.72    | 0.086   | 0.45                            | 212 | 1.82    | 0.069                           |
| Jun     | 482 | 4.15    | 0.000** | 0.69                            | 489 | 4.21    | 0.000**                         |

|      |     |       |         |       |     |       |         |       |
|------|-----|-------|---------|-------|-----|-------|---------|-------|
| Jul  | 342 | 2.94  | 0.003** | 0.41  | 378 | 3.25  | 0.001** | 0.44  |
| Aug  | 404 | 3.47  | 0.001** | 0.52  | 296 | 2.54  | 0.011*  | 0.43  |
| Sep  | 160 | 1.37  | 0.171   | 0.30  | 232 | 1.99  | 0.046*  | 0.31  |
| Oct  | 134 | 1.15  | 0.252   | 0.26  | 130 | 1.11  | 0.266   | 0.28  |
| Year | -14 | -0.11 | 0.911   | -0.04 | -18 | -0.15 | 0.883   | -0.09 |
| T90% | 212 | 1.82  | 0.069   | 0.41  | 222 | 1.90  | 0.057   | 0.31  |

\*- significant at a level of 0.05, \*\*- significant at a level of 0.01
